# Supplementary material for: Enhanced White Matter Fiber Tracts in Advanced Jazz Improvisers
Source: MDPI journal article supplement (doi:10.3390/brainsci11040506), 2021-04-16
Supplement: s1 [file s1]

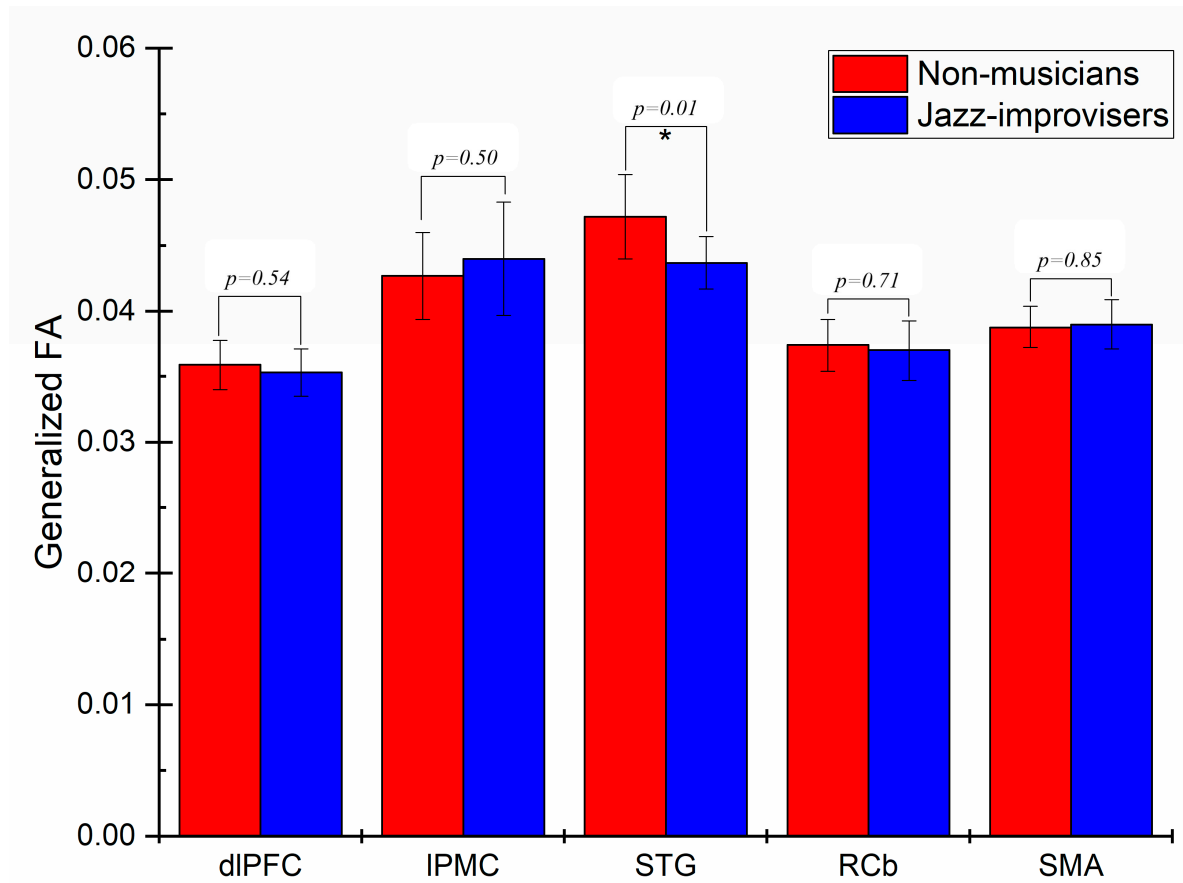

**Figure S1.** Region-based subject-averaged generalized fractional anisotropy (GFA) for advanced jazz improvisers and control non-musicians. No significant differences observed in regional GFA measures except in fiber crossing of STG.

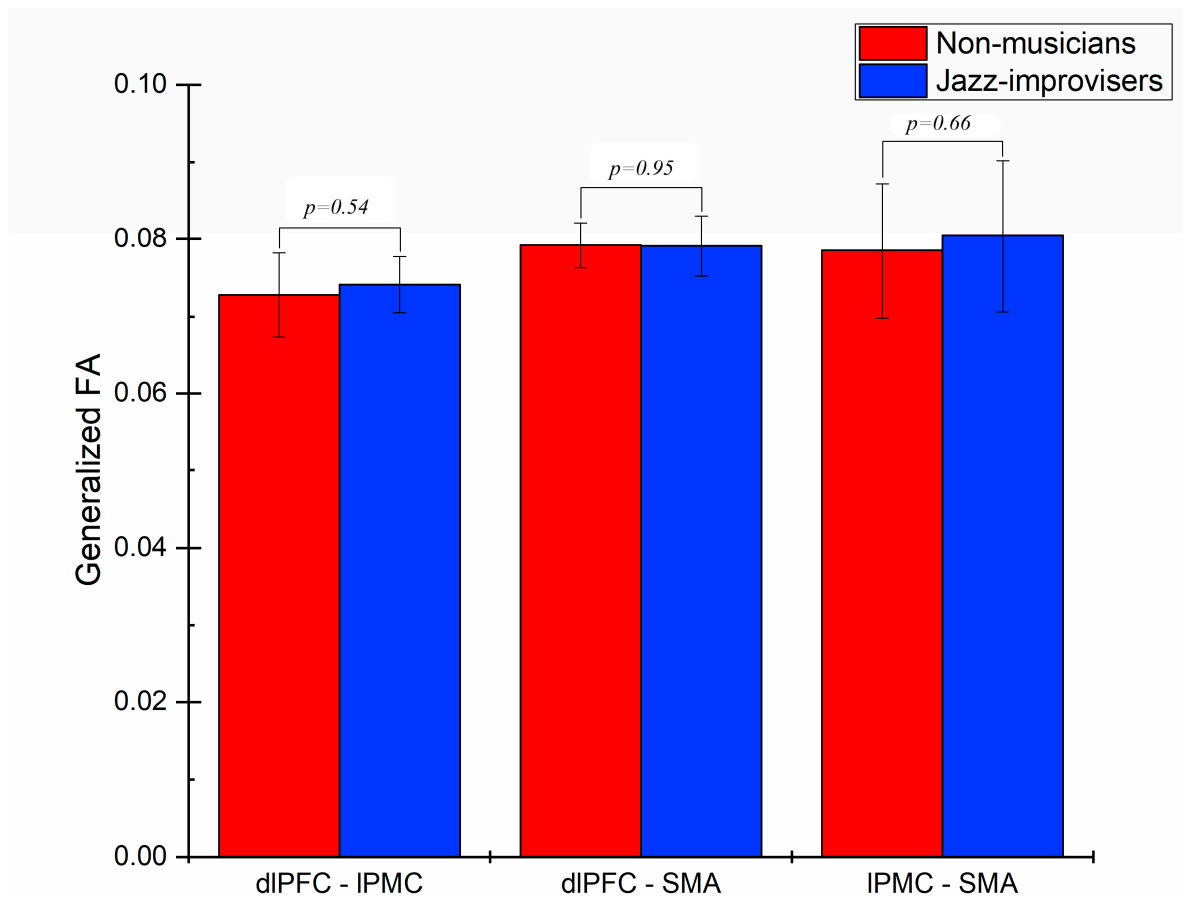

**Figure S2.** Tracks-specific subject-averaged generalized fractional anisotropy (GFA) for advanced jazz improvisers and non-musicians. No significant differences observed in GFA measures in the prefrontal fiber pathways to the supplementary motor area.
